# Supplementary material for: Aerosol from Biomass Combustion in Northern Europe: Influence of Meteorological Conditions and Air Mass History
Source: Preprints.org preprint supplement (doi:10.20944/preprints201911.0145.v1), 2019-11-13
Supplement: Supplementary file 1 [file supplementary]

# Aerosol from Biomass Combustion in Northern Europe: Influence of Meteorological Conditions and Air Mass History

Jun Noda<sup>1,a</sup>, Robert Bergström<sup>1,2,3</sup>, Xiangrui Kong<sup>1</sup>, Torbjörn L. Gustafsson<sup>1</sup>, Borka Kovacevik<sup>1,b</sup>, Maria Svane<sup>1,c</sup>, and Jan B. C. Pettersson<sup>1,4\*</sup>

<sup>1</sup> Department of Chemistry and Molecular Biology, Atmospheric Science, University of Gothenburg, SE - 412 96 Gothenburg, Sweden

<sup>2</sup> Swedish Meteorological and Hydrological Institute, SE - 601 76 Norrköping, Sweden

<sup>3</sup> Department of Space, Earth and Environment, Chalmers University of Technology, SE-412 96 Gothenburg, Sweden

<sup>4</sup> Gothenburg Centre for Sustainable Development, GMV Chalmers University of Technology & University of Gothenburg, Aschebergsgatan 44, SE- 412 96 Göteborg, Sweden

<sup>a</sup> School of Veterinary Medicine, Rakuno Gakuen University, Ebetsu, Hokkaido 069-8501, Japan

<sup>b</sup> Belnigo Consulting, str.Boris Sarafov 42/2/8, Skopje, RN Macedonia

<sup>c</sup> Gothenburg Centre for Sustainable Development, GMV Chalmers University of Technology & University of Gothenburg, Aschebergsgatan 44, SE- 412 96 Göteborg, Sweden

\* Correspondence: Jan Pettersson ([janp@chem.gu.se](mailto:janp@chem.gu.se))

Noda *et al.* Figure S1

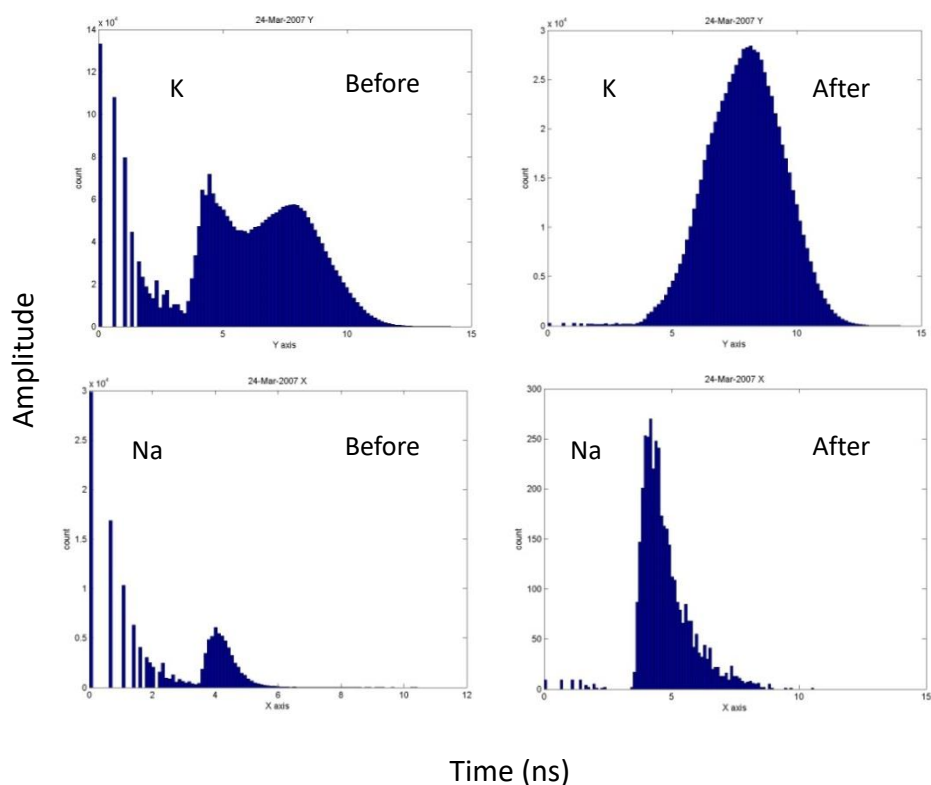

Figure S1 Examples of Na and K spectra before and after noise reduction treatment.

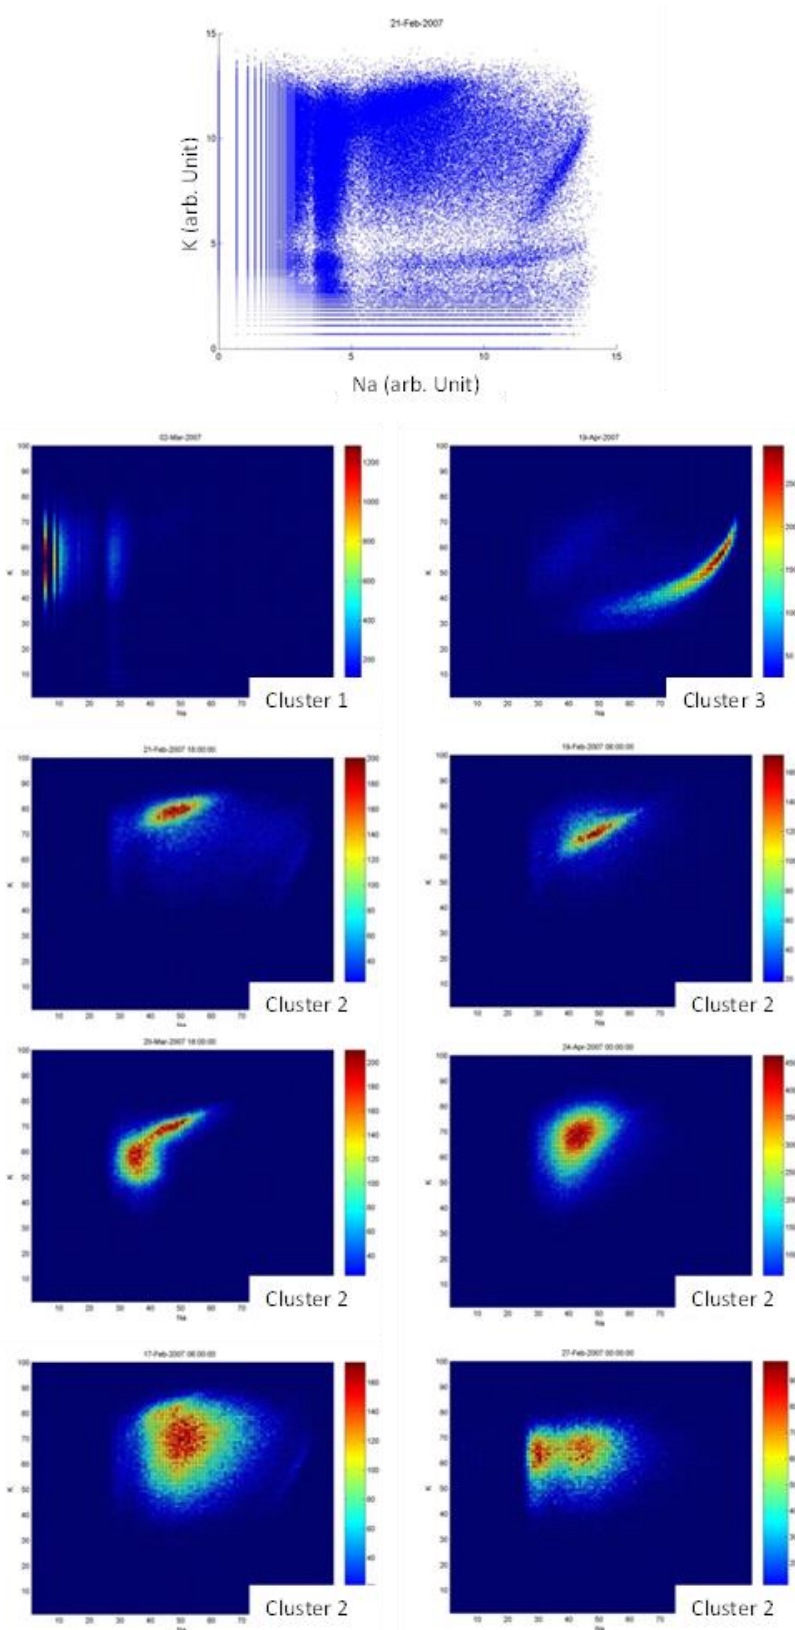

Figure S2 Illustrations of spectra dominated by different clusters shown in color map. Different sub-modes are included in cluster 2. The sampling period for each map is 6 hours.
